# Supplementary material
Source: PubMed Central journal article supplement (PMC8041023)

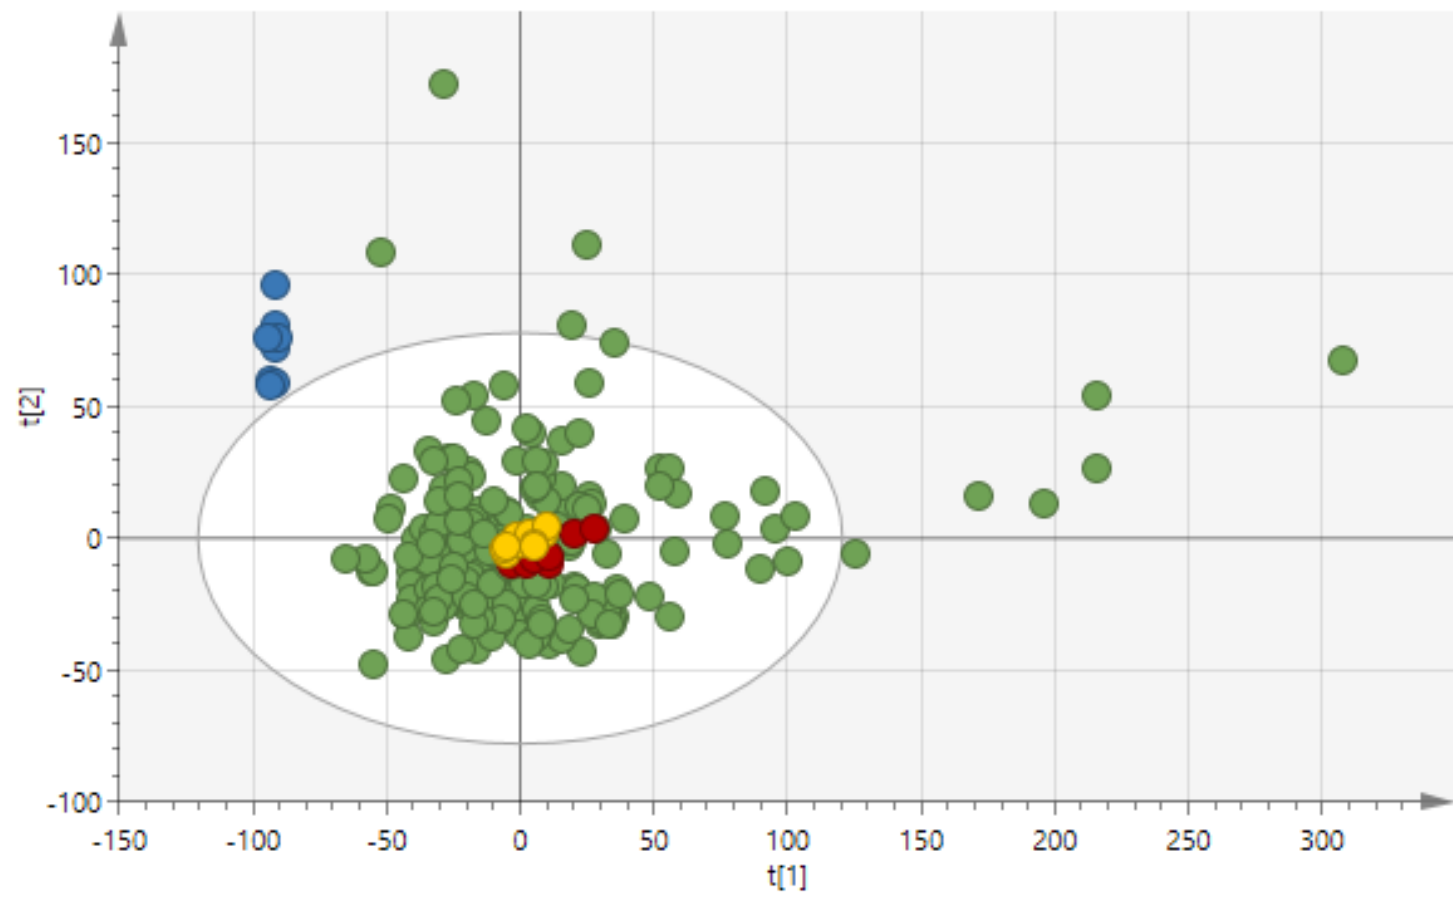

Supplement: NIHMS1537795-supplement-1537795_SuppFig1.pdf [file NIHMS1537795-supplement-1537795_SuppFig1.pdf]

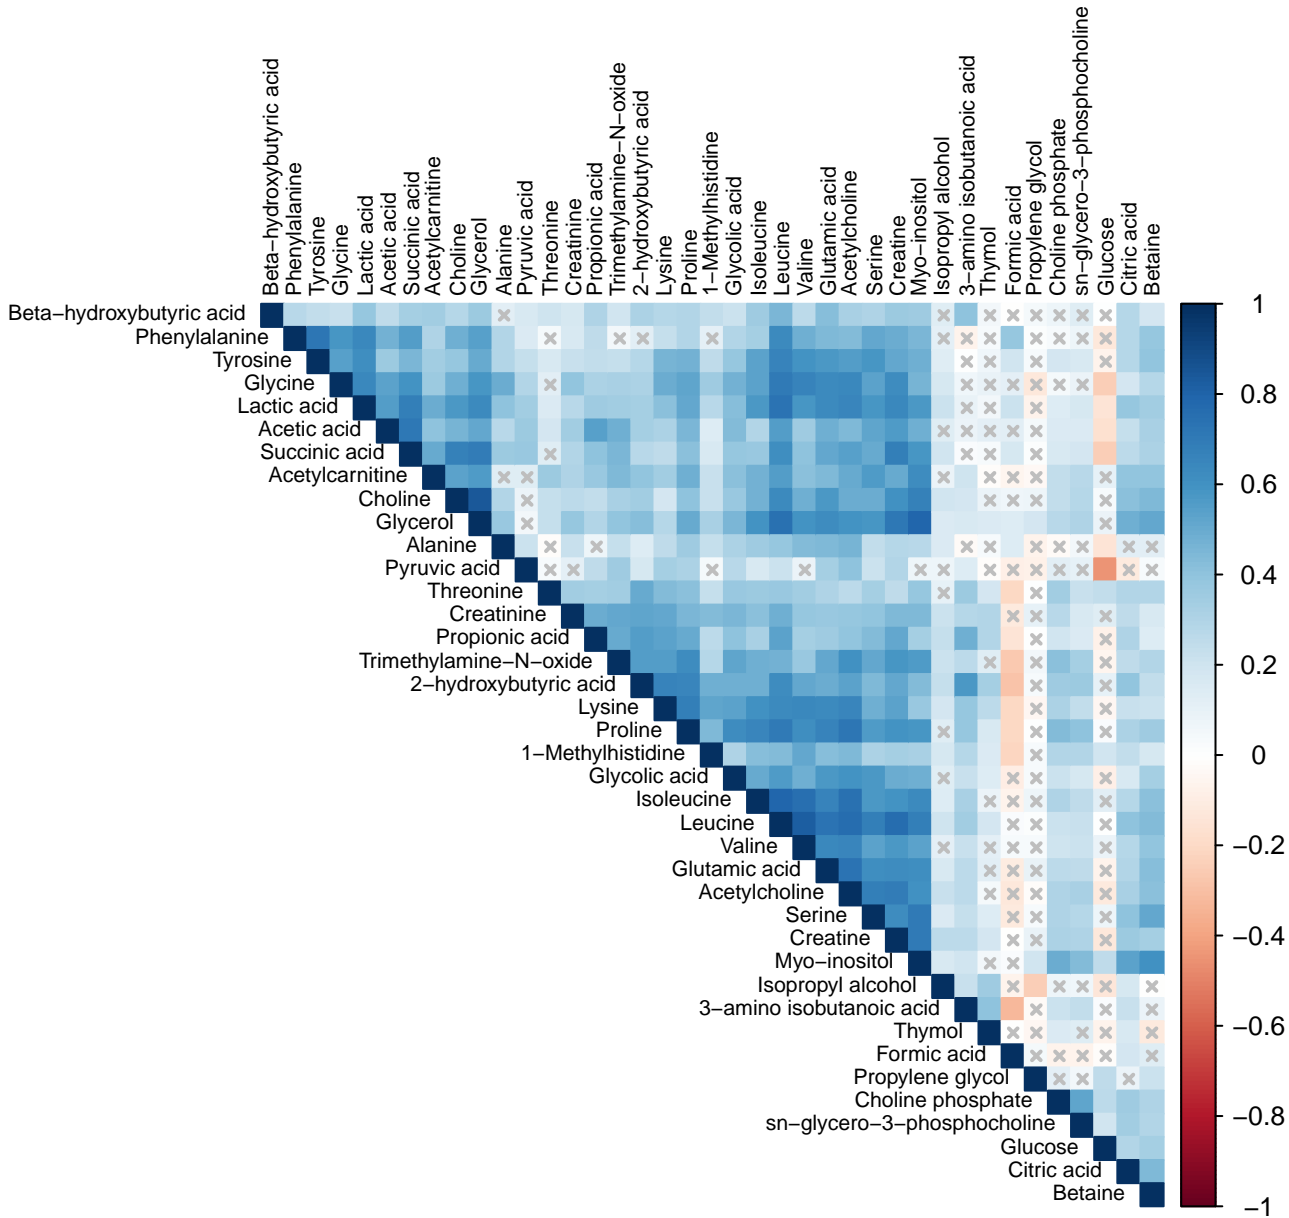

Supplement: NIHMS1537795-supplement-1537795_SuppFig2.pdf [file NIHMS1537795-supplement-1537795_SuppFig2.pdf]

# NMR loadings

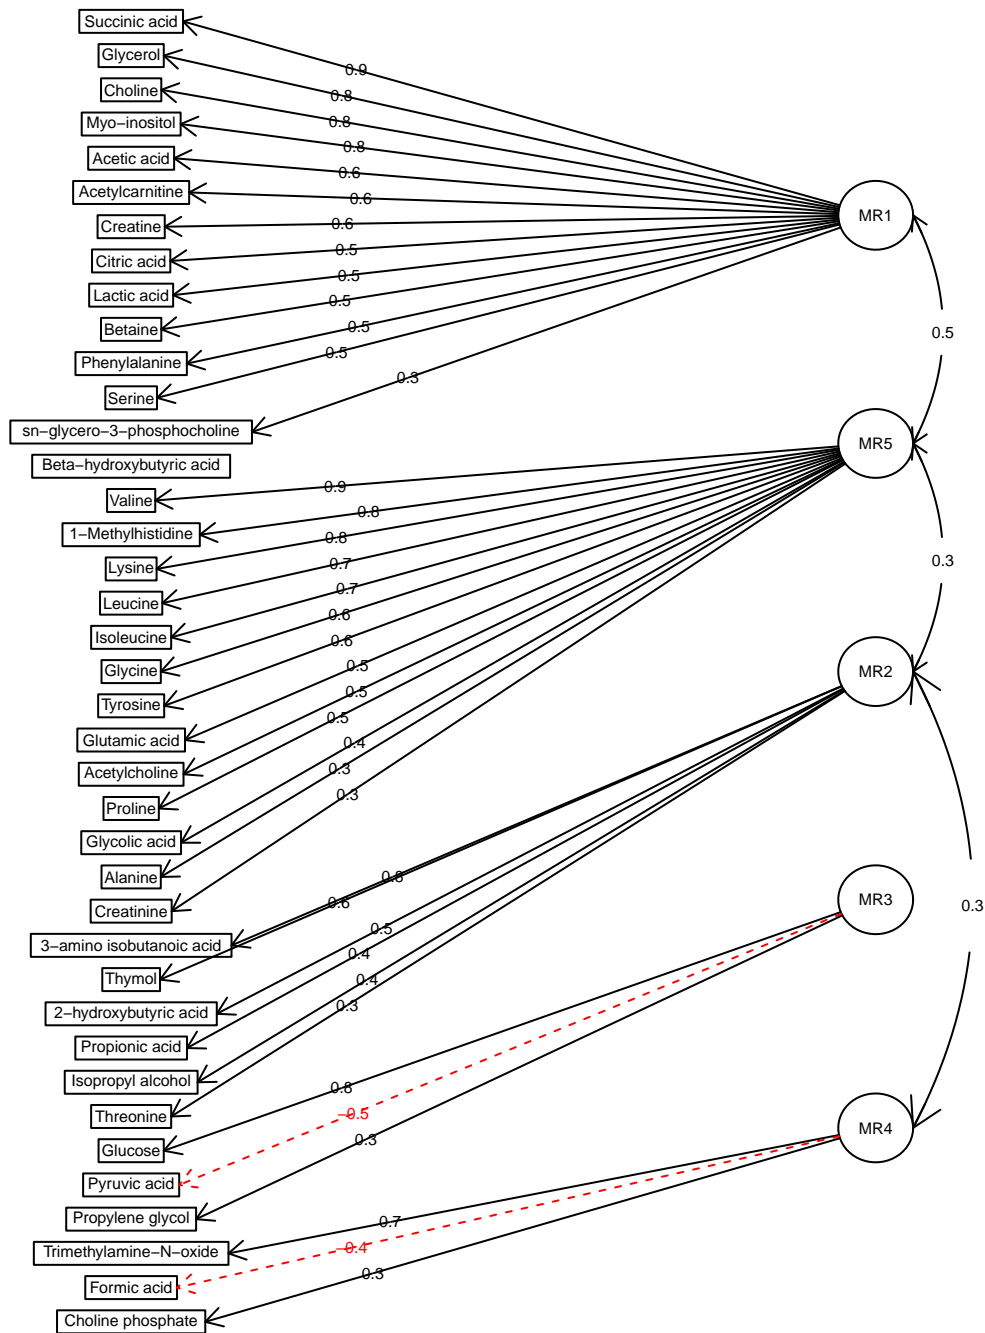

Supplement: NIHMS1537795-supplement-1537795_SuppFig3.pdf [file NIHMS1537795-supplement-1537795_SuppFig3.pdf]
